# Supplementary material for: Thrombopoietin signaling to chromatin elicits rapid and pervasive epigenome remodeling within poised chromatin architectures
Source: PubMed Central journal article supplement (PMC5848609; doi:10.1101/gr.227272.117), 2018-03
Supplement: supp_gr.227272.117_Supplemental_Table_S1.pdf [file supp_gr.227272.117_Supplemental_Table_S1.pdf]

**Supplemental Table S1.** ChIP-seq binding profiles in HPC-7 cells used for statistical learning. SS, serum-starved; SR, self-renewing.

| Feature           | Condition | Reference                            | Repository   | Accession number |
|-------------------|-----------|--------------------------------------|--------------|------------------|
| CTCF              | SS        | This study                           | GEO          | GSE100835        |
| CTCF              | TPO 30'   | This study                           | GEO          | GSE100835        |
| STAT1<br>(uSTAT1) | SS        | This study                           | GEO          | GSE100835        |
| STAT1<br>(pSTAT1) | TPO 30'   | This study                           | GEO          | GSE100835        |
| CBFA2T3           | SR        | <a href="#">(Wilson et al. 2016)</a> | ArrayExpress | E-MTAB-3954      |
| CEBPB             | SR        | <a href="#">(Wilson et al. 2016)</a> | ArrayExpress | E-MTAB-3954      |
| E2F4              | SR        | <a href="#">(Wilson et al. 2016)</a> | ArrayExpress | E-MTAB-3954      |
| EGR1              | SR        | <a href="#">(Wilson et al. 2016)</a> | ArrayExpress | E-MTAB-3954      |
| ELF1              | SR        | <a href="#">(Wilson et al. 2016)</a> | ArrayExpress | E-MTAB-3954      |
| ERG               | SR        | <a href="#">(Wilson et al. 2010)</a> | GEO          | GSE22178         |
| FLI1              | SR        | <a href="#">(Wilson et al. 2010)</a> | GEO          | GSM552233        |
| FOS               | SR        | <a href="#">(Wilson et al. 2016)</a> | ArrayExpress | E-MTAB-3954      |
| GATA2             | SR        | <a href="#">(Wilson et al. 2010)</a> | ArrayExpress | GSM552234        |
| GFI1B             | SR        | <a href="#">(Wilson et al. 2010)</a> | GEO          | GSM552235        |
| JUN               | SR        | <a href="#">(Wilson et al. 2016)</a> | ArrayExpress | E-MTAB-3954      |
| LDB1              | SR        | <a href="#">(Wilson et al. 2016)</a> | ArrayExpress | E-MTAB-3954      |
| LMO2              | SR        | <a href="#">(Wilson et al. 2010)</a> | GEO          | GSM552237        |
| LYL1              | SR        | <a href="#">(Wilson et al. 2010)</a> | GEO          | GSM552238        |
| MAX               | SR        | <a href="#">(Wilson et al. 2016)</a> | ArrayExpress | E-MTAB-3954      |
| MEIS1             | SR        | <a href="#">(Wilson et al. 2010)</a> | GEO          | GSM552239        |
| MYB               | SR        | <a href="#">(Wilson et al. 2016)</a> | ArrayExpress | E-MTAB-3954      |
| MYC               | SR        | <a href="#">(Wilson et al. 2016)</a> | ArrayExpress | E-MTAB-3954      |
| NFE2              | SR        | <a href="#">(Wilson et al. 2016)</a> | ArrayExpress | E-MTAB-3954      |
| RUNX1             | SR        | <a href="#">(Wilson et al. 2010)</a> | GEO          | GSM552241        |
| SPI1              | SR        | <a href="#">(Wilson et al. 2010)</a> | GEO          | GSM552240        |
| STAT5<br>(uSTAT5) | SS        | <a href="#">(Park et al. 2015)</a>   | GEO          | GSE70697         |
| STAT5<br>(pSTAT5) | TPO 30'   | <a href="#">(Park et al. 2015)</a>   | GEO          | GSE70697         |

|      |    |                            |     |            |
|------|----|----------------------------|-----|------------|
| TAL1 | SR | (Wilson et al. 2010)       | GEO | GSM552242  |
| TCF3 | SR | (Calero-nieto et al. 2014) | GEO | GSM1167573 |

## References

- Calero-nieto FJ, Ng FS, Wilson NK, Hannah R, Moignard V, Leal-cervantes AI, Jimenez-madrid I, Diamanti E, Wernisch L. 2014. Key regulators control distinct transcriptional programmes in blood progenitor and mast cells. *EMBO J* **33**: 1212-1226.
- Park HJ, Li J, Hannah R, Biddie S, Leal-cervantes AI, Flores D, Cruz S, Sexl V, Göttgens B, Green AR. 2015. Cytokine-induced megakaryocytic differentiation is regulated by genome-wide loss of a uSTAT transcriptional program. *EMBO J* **35**: 580–594.
- Wilson NK, Foster SD, Wang X, Knezevic K, Schütte J, Kaimakis P, Chilarska PM, Kinston S, Ouwehand WH, Dzierzak E, et al. 2010. Combinatorial transcriptional control in blood stem/progenitor cells: genome-wide analysis of ten major transcriptional regulators. *Cell Stem Cell* **7**: 532–544.
- Wilson NK, Schoenfelder S, Hannah R, Sanchez Castillo M, Schutte J, Ladopoulos V, Mitchelmore J, Goode DK, Calero-Nieto FJ, Moignard V, et al. 2016. Integrated genome-scale analysis of the transcriptional regulatory landscape in a blood stem/progenitor cell model. *Blood* **127**: e12–e23.
