# Supplementary material for: Thrombopoietin signaling to chromatin elicits rapid and pervasive epigenome remodeling within poised chromatin architectures
Source: PubMed Central journal article supplement (PMC5848609; doi:10.1101/gr.227272.117), 2018-03
Supplement: supp_gr.227272.117_Supplemental_Table_S2.pdf [file supp_gr.227272.117_Supplemental_Table_S2.pdf]

**Supplemental Table S2.** Primer sequences used in this study.

| <b>Name</b>                       | <b>Sequence</b>            | <b>Application</b> |
|-----------------------------------|----------------------------|--------------------|
| <i>Calr</i> R1 HindIII            | TCATGAGTTCCCCACATCTTTG     | Hi-C library QC    |
| <i>Calr</i> R3 HindIII            | CTGTGGGCACCAGATGTGTAAAT    | Hi-C library QC    |
| <i>Gapdh</i> (Belton et al. 2012) | TATCAAGGGTGCCCGTCACCTTCAGC | Hi-C library QC    |
| <i>Gapdh</i> (Belton et al. 2012) | GGGCTTTTATAGCACGGTTATAAAGT | Hi-C library QC    |
| <i>Hoxa7</i> fwd HindIII          | GGAGGAGGGAAAAGGAGTGATT     | Hi-C library QC    |
| <i>Hoxa13</i> rev HindIII         | CAGGCATTATTTGCTGAGAACG     | Hi-C library QC    |
| <i>Hist1h2ae</i> fwd HindIII      | GGGTAATGGTGTCACTAACTGG     | Hi-C library QC    |
| <i>Hist1h3e</i> fwd HindIII       | GGGTTTGATGAGTTGGTGAAG      | Hi-C library QC    |
| <i>Hist1h4i</i> fwd HindIII       | TTGGGCCAAAGCCTATATGA       | Hi-C library QC    |
| <i>Hlf</i> fwd                    | GCGCAGAAAGAACAACATGG       | RT-qPCR            |
| <i>Hlf</i> rev                    | GCCCAGCTCCTTCCTTAAAT       | RT-qPCR            |
| <i>Sox4</i> fwd                   | AAGGACAGCGACAAGATTCC       | RT-qPCR            |
| <i>Sox4</i> rev                   | GCCCGACTTCACCTTCTTT        | RT-qPCR            |
| <i>Cxcr4</i> fwd                  | GTGGATGGTGGTGTTC AATTC     | RT-qPCR            |
| <i>Cxcr4</i> rev                  | CTTGGAGTGTGACAGCTTAGAG     | RT-qPCR            |
| <i>Myc</i> fwd                    | CGATTCCACGGCCTTCTC         | RT-qPCR            |
| <i>Myc</i> rev                    | TCTTCCTCATCTTCTTGCTCTTC    | RT-qPCR            |
| <i>Gapdh</i> fwd                  | CATGGCCTTCCGTGTTCCCTA      | RT-qPCR            |
| <i>Gapdh</i> rev                  | CCTGCTTCACCACCTTCTTGAT     | RT-qPCR            |
| <i>Hlf</i> promoter fwd           | GAAGAGAGCACCGGGAAAG        | ChIP-qPCR          |
| <i>Hlf</i> promoter rev           | CAGACCCGCAATTCACAAAG       | ChIP-qPCR          |
| <i>Hlf</i> enhancer fwd           | GGCAGAGGCAATCTCTTCAT       | ChIP-qPCR          |
| <i>Hlf</i> enhancer rev           | GGACTCGTGACATCGTAGTAATG    | ChIP-qPCR          |
| <i>Cxcr4</i> promoter fwd         | GGGCAAACAGAAGTCCAAGA       | ChIP-qPCR          |
| <i>Cxcr4</i> promoter rev         | CTCAAGTTCTCCACCCGTAAAC     | ChIP-qPCR          |
| <i>Spred1</i> enhancer fwd        | GCAGAAAGTGGAAGTGTGAAAG     | ChIP-qPCR          |
| <i>Spred1</i> enhancer rev        | GGCAGGAAGCTGGTATCATAAA     | ChIP-qPCR          |
| <i>Hlf</i> enhancer uSTAT5+ fwd   | GGAGAGACAAAGGTCCCATAAG     | ChIP-qPCR          |
| <i>Hlf</i> enhancer uSTAT5+ rev   | GCCTGGTATTCAGGGTAACAA      | ChIP-qPCR          |
| <i>Cxcr4</i> enhancer uSTAT5+ fwd | GGGCATCTAGCCAAGCATATC      | ChIP-qPCR          |
| <i>Cxcr4</i> enhancer uSTAT5+ rev | ACTAGAGTCGGAGGCTTTCA       | ChIP-qPCR          |
| <i>Sox4-1</i> uSTAT5+ fwd         | TAGCAGGACTCCCAAGAAGA       | ChIP-qPCR          |

|                    |                       |           |
|--------------------|-----------------------|-----------|
| Sox4-1 uSTAT5+ rev | CCGCAGTAACACACACCTAA  | ChIP-qPCR |
| Sox4-2 uSTAT5+ fwd | CTGCTGCCGCTCTTAATACA  | ChIP-qPCR |
| Sox4-2 uSTAT5+ rev | CACTTGAGAGGGAGCAAATCA | ChIP-qPCR |

## References

Belton J, Mccord RP, Gibcus JH, Naumova N, Zhan Y, Dekker J. 2012. Hi-C : A comprehensive technique to capture the conformation of genomes. *EMBO J* **58**: 268–276.
